# Supplementary material for: Mutations in TRIM63 cause an autosomal-recessive form of hypertrophic cardiomyopathy
Source: PubMed Central journal article supplement — Heart. 2020 May 25;106(17):1342–8. doi: 10.1136/heartjnl-2020-316913 (PMC7476281; doi:10.1136/heartjnl-2020-316913), 2020-05-25
Supplement: heartjnl-2020-316913supp001.pdf [file heartjnl-2020-316913supp001.pdf]

**SUPPLEMENTARY FILES****Mutations in TRIM63 cause an autosomal recessive form of hypertrophic cardiomyopathy****Table of contents:**

|                                                                                                                                                          |           |
|----------------------------------------------------------------------------------------------------------------------------------------------------------|-----------|
| <b>Additional GENESCOPIC research groups collaborators .....</b>                                                                                         | <b>2</b>  |
| <b>Supplementary Table 1: List of the genes related to inherited cardiovascular disorders and sudden death included in the custom probe library.....</b> | <b>3</b>  |
| <b>Supplementary Table 2: Allele frequencies according to gnomAD (v2.1.1), bioinformatic predictors and ACMG classification .....</b>                    | <b>9</b>  |
| <b>Supplementary Table 3. Clinical and genetic characteristics of index cases and family members.....</b>                                                | <b>10</b> |
| <b>Supplementary Table 4. Likelihood of the odds (LOD) score.....</b>                                                                                    | <b>14</b> |
| <b>Supplementary Table 5. Detailed clinical characteristics of homozygous/ compound heterozygous individuals.....</b>                                    | <b>16</b> |
| <b>Supplementary Figure 1: Pedigrees of the evaluated families.....</b>                                                                                  | <b>23</b> |
| <b>Supplementary Figure 2. ECG of patients II.6 (H8758) and II.1 (H10022) .....</b>                                                                      | <b>30</b> |
| <b>Supplementary Figure 3. Schematic representation of the ubiquitin proteasome system.....</b>                                                          | <b>31</b> |
| <b>Supplementary Figure 4. Conservation of the RING domain of TRIM63.....</b>                                                                            | <b>32</b> |

**Additional GENESCOPIC (GENES in Cardiac Outcomes and Prognosis of Inherited Cardiomyopathies) research group collaborators:**

**Health in Code:** Xusto Fernández, Elena Veira, David de Uña, Pablo Iglesias, Noël Brögger, Germán Fernández

**Hospital Universitario Puerta de Hierro:** Marta Cobo-Marcos, María A. Restrepo-Córdoba, Esther González-López

**Saint Bartholomew's Hospital:** Luis R. Lopes

**Hospital Universitario de Getafe:** Jesús Saavedra

**Hospital Clínico Universitario de Valladolid:** María Sandín-Fuentes, Iria Duro-Aguado

**Hospital General Universitario de Alicante:** María García Álvarez

**Supplementary Table 1:** List of the genes related to inherited cardiovascular disorders and sudden death included in the custom probe library

| <b>Gene</b>     | <b>Protein name</b>                                            |
|-----------------|----------------------------------------------------------------|
| <b>AARS2</b>    | Alanine-tRNA ligase, mitochondrial                             |
| <b>ABCC9</b>    | ATP-binding cassette, sub-family C (CFTR/MRP), member 9        |
| <b>ACAD9</b>    | Acyl-CoA dehydrogenase family member 9, mitochondrial          |
| <b>ACADVL</b>   | Very long-chain specific acyl-CoA dehydrogenase, mitochondrial |
| <b>ACTA1</b>    | Actin, alfa 1, skeletal muscle                                 |
| <b>ACTC1</b>    | Actin, alpha cardiac muscle 1                                  |
| <b>ACTN2</b>    | Alpha-actinin-2                                                |
| <b>AGK</b>      | Acylglycerol kinase, mitochondrial                             |
| <b>AGL</b>      | Glycogen debranching enzyme                                    |
| <b>AGPAT2</b>   | 1-acyl-sn-glycerol-3-phosphate acyltransferase beta            |
| <b>AKAP9</b>    | A-kinase anchor protein 9                                      |
| <b>ALMS1</b>    | Alstrom syndrome protein 1                                     |
| <b>ANK2</b>     | Ankyrin 2                                                      |
| <b>ANK3</b>     | Ankyrin-3                                                      |
| <b>ANKRD1</b>   | Ankyrin repeat domain-containing protein 1                     |
| <b>ANO5</b>     | Anoctamin-5                                                    |
| <b>ATP5F1E</b>  | ATP synthase subunit epsilon, mitochondrial                    |
| <b>ATPAF2</b>   | ATP synthase mitochondrial F1 complex assembly factor 2        |
| <b>BAG3</b>     | BAG family molecular chaperone regulator 3                     |
| <b>BRAF</b>     | Serine/threonine-protein kinase B-raf                          |
| <b>BSCL2</b>    | Seipin                                                         |
| <b>CACNA1C</b>  | Voltage-dependent L-type calcium channel subunit alpha-1C      |
| <b>CACNA1D</b>  | Voltage-dependent L-type calcium channel subunit alpha-1D      |
| <b>CACNA2D1</b> | Voltage-dependent calcium channel subunit alpha-2/delta-1      |
| <b>CACNB2</b>   | Voltage-dependent L-type calcium channel subunit beta-2        |
| <b>CALM1</b>    | Calmodulin                                                     |
| <b>CALM2</b>    | Calmodulin                                                     |
| <b>CALM3</b>    | Calmodulin                                                     |
| <b>CALR3</b>    | Calreticulin 3                                                 |
| <b>CAPN3</b>    | Calpain-3                                                      |
| <b>CASQ2</b>    | Calsequestrin-2                                                |
| <b>CAV3</b>     | Caveolin 3                                                     |
| <b>CAVIN1</b>   | Polymerase I and transcript release factor                     |
| <b>CAVIN4</b>   | Caveolae-associated protein 4                                  |
| <b>CHRM2</b>    | muscarinic acetylcholine receptor M2                           |
| <b>COA5</b>     | cytochrome c oxidase assembly factor 5                         |

| Gene    | Protein name                                                  |
|---------|---------------------------------------------------------------|
| COA6    | cytochrome c oxidase assembly factor 6 homolog                |
| COL7A1  | collagen alpha-1(VII) chain                                   |
| COQ2    | 4-hydroxybenzoate polyprenyltransferase, mitochondrial        |
| COX15   | Cytochrome c oxidase assembly protein COX15 homolog           |
| COX6B1  | Cytochrome c oxidase subunit 6B1                              |
| CRYAB   | Alpha-crystallin B chain                                      |
| CSRP3   | Cysteine and glycine-rich protein 3                           |
| CTNNA3  | catenin alpha-3                                               |
| CTNNB1  | catenin beta-1                                                |
| DES     | Desmin                                                        |
| DLD     | Dihydrolipoyl dehydrogenase, mitochondrial                    |
| DMD     | Dystrophin                                                    |
| DNAJC19 | Mitochondrial import inner membrane translocase subunit TIM14 |
| DNM1L   | Dynamamin-1-like protein                                      |
| DOLK    | Dolichol kinase                                               |
| DSC2    | Desmocollin 2                                                 |
| DSG2    | Desmoglein 2                                                  |
| DSP     | Desmoplakin                                                   |
| DTNA    | Dystrobrevin alpha                                            |
| ELAC2   | Zinc phosphodiesterase ELAC protein 2                         |
| EMD     | Emerin                                                        |
| EYA4    | Eyes absent homolog 4                                         |
| FAH     | Fumarylacetoacetase                                           |
| FGF12   | Fibroblast growth factor 12                                   |
| FHL1    | Four and a half LIM domains protein 1                         |
| FHL2    | Four and a half LIM domains 2 (FHL-2)                         |
| FHOD3   | FH1/FH2 domain-containing protein 3                           |
| FKRP    | Fukutin-related protein                                       |
| FKTN    | Fukutin                                                       |
| FLNC    | Filamin-C                                                     |
| FOXD4   | Forkhead box protein D4                                       |
| FOXRED1 | FAD-dependent oxidoreductase domain-containing protein 1      |
| FXN     | Frataxin, mitochondrial                                       |
| GAA     | Lysosomal alpha-glucosidase                                   |
| GATA4   | Transcription factor GATA-4                                   |
| GATA5   | Transcription factor GATA-5                                   |
| GATA6   | Transcription factor GATA-6                                   |
| GATAD1  | GATA zinc finger domain-containing protein 1                  |
| GFM1    | Elongation factor G, mitochondrial                            |
| GJA1    | Gap junction alpha-1 protein                                  |

| <b>Gene</b>   | <b>Protein name</b>                                                            |
|---------------|--------------------------------------------------------------------------------|
| <b>GJA5</b>   | Gap junction alpha-5 protein                                                   |
| <b>GLA</b>    | Alpha galactosidase A                                                          |
| <b>GLB1</b>   | Beta-galactosidase                                                             |
| <b>GNPTAB</b> | N-acetylglucosamine-1-phosphotransferase subunits alpha/beta                   |
| <b>GPD1L</b>  | Glycerol-3-phosphate dehydrogenase 1-like protein                              |
| <b>GREM2</b>  | Gremlin-2                                                                      |
| <b>GUSB</b>   | Beta-glucuronidase                                                             |
| <b>HCN4</b>   | Potassium/sodium hyperpolarization-activated cyclic nucleotide-gated channel 4 |
| <b>HFE</b>    | Hereditary hemochromatosis protein                                             |
| <b>HRAS</b>   | GTPase HRas                                                                    |
| <b>IDH2</b>   | isocitrate dehydrogenase [NADP], mitochondrial                                 |
| <b>ILK</b>    | Integrin-linked protein kinase                                                 |
| <b>IRX3</b>   | iroquois-class homeodomain protein IRX-3                                       |
| <b>JPH2</b>   | Junctophilin 2                                                                 |
| <b>JUP</b>    | Junction plakoglobin                                                           |
| <b>KCNA5</b>  | Potassium voltage-gated channel subfamily A member 5                           |
| <b>KCND2</b>  | Potassium voltage-gated channel subfamily D member 2                           |
| <b>KCND3</b>  | Potassium voltage-gated channel subfamily D member 3                           |
| <b>KCNE1</b>  | Potassium voltage-gated channel subfamily E member 1                           |
| <b>KCNE2</b>  | Potassium voltage-gated channel subfamily E member 2                           |
| <b>KCNE3</b>  | Potassium voltage-gated channel subfamily E member 3                           |
| <b>KCNE5</b>  | Potassium voltage-gated channel subfamily E member 1-like protein              |
| <b>KCNH2</b>  | Potassium voltage-gated channel subfamily H member 2                           |
| <b>KCNJ2</b>  | Inward rectifier potassium channel 2                                           |
| <b>KCNJ5</b>  | G protein-activated inward rectifier potassium channel 4                       |
| <b>KCNJ8</b>  | ATP-sensitive inward rectifier potassium channel 8                             |
| <b>KCNK17</b> | Potassium channel subfamily K member 17                                        |
| <b>KCNK3</b>  | potassium channel subfamily K member 3                                         |
| <b>KCNQ1</b>  | Potassium voltage-gated channel subfamily KQT member 1                         |
| <b>KLF10</b>  | Krueppel-like factor 10                                                        |
| <b>KRAS</b>   | GTPase KRas                                                                    |
| <b>LAMA2</b>  | Laminin subunit alpha-2                                                        |
| <b>LAMA4</b>  | Laminin subunit alpha-4                                                        |
| <b>LAMP2</b>  | Lysosome-associated membrane glycoprotein 2                                    |
| <b>LDB3</b>   | LIM domain-binding protein 3                                                   |
| <b>LDLR</b>   | Low density lipoprotein receptor                                               |
| <b>LIAS</b>   | Lipoyl synthase, mitochondrial                                                 |
| <b>LMNA</b>   | Prelamin-A/C                                                                   |
| <b>LZTR1</b>  | Leucine-zipper-like transcriptional regulator 1                                |

| <b>Gene</b>   | <b>Protein name</b>                                                            |
|---------------|--------------------------------------------------------------------------------|
| <b>MAP2K1</b> | Dual specificity mitogen-activated protein kinase kinase 1                     |
| <b>MAP2K2</b> | Dual specificity mitogen-activated protein kinase kinase 2                     |
| <b>MIB1</b>   | E3 ubiquitin-protein ligase MIB1                                               |
| <b>MLYCD</b>  | Malonyl-CoA decarboxylase, mitochondrial                                       |
| <b>MRPL3</b>  | 39S ribosomal protein L3, mitochondrial                                        |
| <b>MRPL44</b> | 39S ribosomal protein L44, mitochondrial                                       |
| <b>MRPS22</b> | 28S ribosomal protein S22, mitochondrial                                       |
| <b>MTO1</b>   | Protein MTO1 homolog, mitochondrial                                            |
| <b>MYBPC3</b> | Myosin-binding protein C, cardiac-type                                         |
| <b>MYH11</b>  | Myosin-11                                                                      |
| <b>MYH6</b>   | Myosin-6                                                                       |
| <b>MYH7</b>   | Myosin-7                                                                       |
| <b>MYL2</b>   | Myosin regulatory light chain 2, ventricular/cardiac muscle isoform            |
| <b>MYL3</b>   | Myosin light chain 3                                                           |
| <b>MYLK2</b>  | Myosin light chain kinase 2, skeletal/cardiac muscle                           |
| <b>MYOM1</b>  | Myomesin-1                                                                     |
| <b>MYOT</b>   | Myotilin                                                                       |
| <b>MYOZ2</b>  | Myozenin-2                                                                     |
| <b>MYPN</b>   | Myopalladin                                                                    |
| <b>NEBL</b>   | Nebulette                                                                      |
| <b>NEXN</b>   | Nexilin                                                                        |
| <b>NF1</b>    | Neurofibromin                                                                  |
| <b>NKX2-5</b> | Homeobox protein Nkx-2.5                                                       |
| <b>NKX2-6</b> | Homeobox protein Nkx-2.6                                                       |
| <b>NNT</b>    | NAD(P) transhydrogenase, mitochondrial                                         |
| <b>NOS1AP</b> | Carboxyl-terminal PDZ ligand of neuronal nitric oxide synthase protein         |
| <b>NOTCH1</b> | Neurogenic locus notch homolog protein 1                                       |
| <b>NPPA</b>   | Atrial natriuretic factor                                                      |
| <b>NRAS</b>   | GTPase NRas                                                                    |
| <b>OBSCN</b>  | Obscurin                                                                       |
| <b>OBSL1</b>  | Obscurin-like protein 1                                                        |
| <b>OPA3</b>   | optic atrophy 3 protein                                                        |
| <b>PDHA1</b>  | Pyruvate dehydrogenase E1 component subunit alpha, somatic form, mitochondrial |
| <b>PDLIM3</b> | PDZ and LIM domain protein 3                                                   |
| <b>PERP</b>   | p53 apoptosis effector related to PMP-22                                       |
| <b>PHKA1</b>  | Phosphorylase b kinase regulatory subunit alpha, skeletal muscle isoform       |
| <b>PITX2</b>  | Pituitary homeobox 2                                                           |
| <b>PKP2</b>   | Plakophilin 2                                                                  |
| <b>PKP4</b>   | Plakophilin 4                                                                  |

| <b>Gene</b>     | <b>Protein name</b>                                                      |
|-----------------|--------------------------------------------------------------------------|
| <b>PLN</b>      | Cardiac phospholamban                                                    |
| <b>PMM2</b>     | Phosphomannomutase 2                                                     |
| <b>PPP1R13L</b> | relA-associated inhibitor                                                |
| <b>PRDM16</b>   | PR domain zinc finger protein 16                                         |
| <b>PRKAG2</b>   | 5'-AMP-activated protein kinase subunit gamma-2                          |
| <b>PSEN1</b>    | Presenilin-1                                                             |
| <b>PSEN2</b>    | Presenilin-2                                                             |
| <b>PTPN11</b>   | Tyrosine-protein phosphatase non-receptor type 11                        |
| <b>RAF1</b>     | RAF proto-oncogene serine/threonine-protein kinase                       |
| <b>RANGRF</b>   | Ran guanine nucleotide release factor                                    |
| <b>RASA2</b>    | ras GTPase-activating protein 2                                          |
| <b>RBM20</b>    | Probable RNA-binding protein 20                                          |
| <b>RIT1</b>     | GTP-binding protein Rit1                                                 |
| <b>RRAS</b>     | ras-related protein R-Ras                                                |
| <b>RYR2</b>     | Ryanodine receptor 2                                                     |
| <b>SCN10A</b>   | sodium channel protein type 10 subunit alpha                             |
| <b>SCN1B</b>    | Sodium channel subunit beta-1                                            |
| <b>SCN2B</b>    | Sodium channel subunit beta-2                                            |
| <b>SCN3B</b>    | Sodium channel subunit beta-3                                            |
| <b>SCN4B</b>    | Sodium channel subunit beta-4                                            |
| <b>SCN5A</b>    | Sodium channel protein type 5 subunit alpha                              |
| <b>SCO2</b>     | Protein SCO2 homolog, mitochondrial                                      |
| <b>SDHA</b>     | Succinate dehydrogenase [ubiquinone] flavoprotein subunit, mitochondrial |
| <b>SGCA</b>     | Alpha-sarcoglycan                                                        |
| <b>SGCB</b>     | Beta-sarcoglycan                                                         |
| <b>SGCD</b>     | Delta-sarcoglycan                                                        |
| <b>SHOC2</b>    | Leucine-rich repeat protein SHOC-2                                       |
| <b>SLC22A5</b>  | Solute carrier family 22 member 5                                        |
| <b>SLC25A3</b>  | phosphate carrier protein, mitochondrial                                 |
| <b>SLC25A4</b>  | ADP/ATP translocase 1                                                    |
| <b>SLMAP</b>    | Sarcolemmal membrane-associated protein                                  |
| <b>SNTA1</b>    | Alpha-1-syntrophin                                                       |
| <b>SOS1</b>     | Son of sevenless homolog 1                                               |
| <b>SOS2</b>     | Son of sevenless homolog 2                                               |
| <b>SPEG</b>     | Striated muscle preferentially expressed protein kinase                  |
| <b>SPRED1</b>   | Sprouty-related, EVH1 domain-containing protein 1                        |
| <b>SRY</b>      | Sex-determining region Y protein                                         |
| <b>SURF1</b>    | Surfeit locus protein 1                                                  |
| <b>SYNE1</b>    | Nesprin-1                                                                |
| <b>SYNE2</b>    | Nesprin-2                                                                |
| <b>TAZ</b>      | Tafazzin                                                                 |

| <b>Gene</b>     | <b>Protein name</b>                                              |
|-----------------|------------------------------------------------------------------|
| <b>TBX20</b>    | T-box transcription factor TBX20                                 |
| <b>TBX5</b>     | T-box transcription factor TBX5                                  |
| <b>TCAP</b>     | Telethonin                                                       |
| <b>TGFB3</b>    | Transforming growth factor, beta 3                               |
| <b>TMEM43</b>   | Transmembrane protein 43                                         |
| <b>TMEM70</b>   | Transmembrane protein 70, mitochondrial                          |
| <b>TMPO</b>     | Thymopoietin                                                     |
| <b>TNNC1</b>    | Troponin C, slow skeletal and cardiac muscles                    |
| <b>TNNI3</b>    | Troponin I, cardiac muscle                                       |
| <b>TNNI3K</b>   | Serine/threonine-protein kinase TNNI3K                           |
| <b>TNNT2</b>    | Troponin T, cardiac muscle                                       |
| <b>TOR1AIP1</b> | torsin-1A-interacting protein 1                                  |
| <b>TPM1</b>     | Tropomyosin alpha-1 chain                                        |
| <b>TRDN</b>     | Triadin                                                          |
| <b>TRIM63</b>   | E3 ubiquitin-protein ligase TRIM63                               |
| <b>TRPM4</b>    | Transient receptor potential cation channel subfamily M member 4 |
| <b>TSFM</b>     | Elongation factor Ts, mitochondria                               |
| <b>TTN</b>      | Titin                                                            |
| <b>TTR</b>      | Transthyretin                                                    |
| <b>TXNRD2</b>   | Thioredoxin reductase 2, mitochondrial                           |
| <b>VCL</b>      | Vinculin                                                         |
| <b>XK</b>       | Membrane transport protein XK                                    |
| <b>ZFHX3</b>    | Zinc finger homeobox protein 3                                   |
| <b>ZFPM2</b>    | Zinc finger homeobox protein 3                                   |



**Supplementary Table 2:** Allele frequencies according to gnomAD (v2.1.1), bioinformatic predictors and ACMG classification\*.

| Protein            | cDNA                    | Allele count gnomAD | Allele number gnomAD | Number of homozygous carriers gnomAD | MAF gnomAD | Polyphen 2          | Mutation taster        | SIFT           | DANN     | FATHMM  | CADD      | ClinVar               | Variant classification* (without cosegregation) |
|--------------------|-------------------------|---------------------|----------------------|--------------------------------------|------------|---------------------|------------------------|----------------|----------|---------|-----------|-----------------------|-------------------------------------------------|
| p.(Cys23Tyr)       | c.68G>A                 | 8                   | 251384               | 0                                    | 0.00003    | Probably damaging/1 | Disease-causing / 1    | Damaging/0     | 0.997661 | 0.99477 | 6.509411  | N/A                   | Likely pathogenic (PS4, PM1, PM2, PP3)          |
| p.(Leu37Val)       | c.109T>G                | 0                   |                      |                                      | 0          | Probably damaging/1 | Disease-causing / 0.99 | Damaging/0     | 0.997858 | 0.98309 | 4.546217  | N/A                   | VUS (PM2, PP3)                                  |
| p.(Cys75Tyr)       | c.224G>A                | 28                  | 281352               | 0                                    | 0.00009    | Probably damaging/1 | Disease-causing / 1    | Damaging/0     | 0.997589 | 0.99484 | 6.505493  | 1 VUS                 | Likely pathogenic (PM1, PM2, PM3, PP3)          |
| p.(Cys145Tyr)      | c.434G>A                | 6                   | 251436               | 0                                    | 0.00002    | Probably damaging/1 | Disease-causing / 1    | Damaging/0     | 0.997688 | 0.97016 | 6.2988    | N/A                   | VUS (PM1, PM2, PP3)                             |
| p.(Lys146Thrfs*24) | c.437_442delAGGTGTinsCC | 0                   |                      |                                      | 0          |                     | Disease-causing / 1    |                |          |         |           | N/A                   | Likely pathogenic (PS4, PM2, PM3, PP3)          |
| p.(Ser161Cysfs*8)  | c.481_482delAG          | 12                  | 282386               | 0                                    | 0.00004    |                     | Disease-causing / 1    |                |          |         | 8.107172  | N/A                   | Likely pathogenic (PS4, PM2, PM3, PP3)          |
| p.(Gln247*)        | c.739C>T                | 192                 | 282876               | 0                                    | 0.0006     |                     | Disease-causing / 1    | Tolerated 0.96 | 0.997504 | 0.97216 | 11.872989 | 1 LB<br>1 VUS<br>2 LP | Likely pathogenic (PS3, PM2, PP3)               |
| p.(Leu319Pro)      | c.956T>C                | 24                  | 251442               | 0                                    | 0.00009    | Probably damaging/1 | Disease-causing / 1    | Damaging/0     | 0.99895  | 0.99895 | 5.621389  | N/A                   | VUS (PM2, PP3)                                  |

\*Note: Care should be taken when applying these rules, as the ACMG guidelines are not intended to be applied in the setting of candidate gene studies.

**Supplementary Table 3.** Clinical and genetic characteristics of index cases and evaluated family members.

| Family       | Subject | Gender           | TRIM63 variants   | Decade at diagnosis or last FU | Phenotype                  | LVMWT (mm) | EF (%)       | Symptoms at first evaluation | ECG                      | Events | Additional genetic variants |
|--------------|---------|------------------|-------------------|--------------------------------|----------------------------|------------|--------------|------------------------------|--------------------------|--------|-----------------------------|
| <b>H8343</b> | II.2    | F                | p.(Cys23Tyr) +/+  | 20s/40s                        | HCM                        | 20         | 68           | Asymptomatic                 | SR, LVHC<br>Holter: NSVT | CVE    |                             |
|              | II.4    | M                | p.(Cys23Tyr) +/+  | 20s/40s                        | HCM                        | 28         | 70           | Asymptomatic                 | SR, LVHC<br>Holter: NSVT |        |                             |
|              | II.6    | F                | Non-carrier       | 40s                            | Normal                     | 8          | 65           | Asymptomatic                 | SR                       |        |                             |
|              | I.1     | M                | p.(Cys23Tyr) +/-  | 60s                            | Hypertensive heart disease | 15         | 62           | Asymptomatic                 | SR. No LVHC              |        |                             |
|              | I.2     | F                | p.(Cys23Tyr) +/-  | 60s                            | Normal                     | 12         | 60           | Asymptomatic                 | SR                       |        |                             |
|              | III.1   | F                | p.(Cys23Tyr) +/-  | 10s                            | Normal                     | 8          | 65           | Asymptomatic                 | SR                       |        |                             |
|              | III.2   | F                | ?                 | 10s                            | Normal                     | 7          | 64           | Asymptomatic                 | SR                       |        |                             |
| <b>H8758</b> | II.11   | M                | p.(Leu319Pro) +/+ | 20s/40s                        | HCM                        | 22         | 70           | Asymptomatic                 | SR                       |        | COQ2 p.(Gln94Hisfs*78) +/-  |
|              | II.6    | F                | p.(Leu319Pro) +/+ | 40s                            | Possibly affected          | 9          | 68           | Asymptomatic                 | SR, ATWI + LVHC          |        |                             |
|              | I.1     | M                | p.(Leu319Pro) +/- | 80s                            | Normal                     | 10         | 60           | Asymptomatic                 | SR                       | TIA    |                             |
|              | I.2     | F                | p.(Leu319Pro) +/- | 70s                            | Normal                     | 10         | 57           | Asymptomatic                 | SR                       |        |                             |
|              | II.2    | M                | p.(Leu319Pro) +/- | 50s                            | Normal                     | 11         | 67           | Asymptomatic                 | SR                       |        |                             |
|              | II.3    | F                | p.(Leu319Pro) +/- | 50s                            | Normal                     | 8          | 60           | Asymptomatic                 | SR                       |        |                             |
|              | II.4    | F                | p.(Leu319Pro) +/- | 40s                            | Normal                     | 8          | 58           | Asymptomatic                 | SR                       |        |                             |
|              | II.7    | F                | p.(Leu319Pro) +/- | 40s                            | Normal                     | 9          | 62           | Asymptomatic                 | SR                       |        |                             |
|              | II.9    | M                | Non-carrier       | 40s                            | Normal                     | 8          | 64           | Asymptomatic                 | SR                       |        |                             |
|              | II.13   | M                | p.(Leu319Pro) +/- | 30s                            | Normal                     | 11         | 60           | Asymptomatic                 | SR                       |        |                             |
|              | II.14   | M                | p.(Leu319Pro) +/- | 30s                            | Normal                     | 9          | 65           | Asymptomatic                 | SR                       |        |                             |
|              | II.15   | F                | p.(Leu319Pro) +/- | 30s                            | Normal                     | 9          | 65           | Asymptomatic                 | SR                       |        |                             |
| III.3        | M       | ?                | 20s               | Normal                         | 9                          | 60         | Asymptomatic | SR                           |                          |        |                             |
| III.4        | M       | ?                | 20s               | Normal                         | 8                          | 63         | Asymptomatic | SR                           |                          |        |                             |
| III.6        | F       | Obligate carrier | 10s               | Normal                         | 6                          | 60         | Asymptomatic | SR                           |                          |        |                             |

|               |             |   |                        |         |                            |    |    |                                  |                               |                                                                         |                                                   |
|---------------|-------------|---|------------------------|---------|----------------------------|----|----|----------------------------------|-------------------------------|-------------------------------------------------------------------------|---------------------------------------------------|
| <b>H5180</b>  | <b>II.2</b> | F | p.(Cys23Tyr) +/-       | 50s/70s | HCM                        | 20 | 65 | Heart Failure (NYHA II)          | Second-degree AV block + RBBB |                                                                         | RYR2 p.(His464Gln) +/-<br>TTN p.(Gly16395Glu) +/- |
|               | II.9        | F | p.(Cys23Tyr) +/-       | 60s     | Normal                     | 9  | 60 | Asymptomatic                     | SR                            |                                                                         |                                                   |
|               | III.1       | M | p.(Cys23Tyr) +/-       | 50s     | Hypertensive heart disease | 13 | 67 | Asymptomatic                     | SR<br>No LVHC                 |                                                                         |                                                   |
|               | III.2       | M | p.(Cys23Tyr) +/-       | 30s     | Normal                     | 11 | 60 | Asymptomatic                     | SR                            |                                                                         |                                                   |
|               | II.7        | M | ?                      | 30s/40s | End-stage HCM              |    |    | Advanced Heart Failure (NYHA IV) |                               | Heart transplant (age 38)<br>Non-CV death (42,hepatocellular carcinoma) |                                                   |
| <b>H10022</b> | <b>II.2</b> | M | p.(Gln247*) +/+        | 20s/30s | HCM                        | 16 | 56 | Palpitations                     | SR. LVHC<br>Holter:<br>PVC    |                                                                         | OBSCN p.(Leu7883Arg) +/-                          |
|               | II.1        | M | p.(Gln247*) +/+        | 30s     | Possibly affected          | 12 | 64 | Asymptomatic                     | SR. LVHC                      |                                                                         |                                                   |
|               | II.3        | F | Non-carrier            | 10s     | Normal                     | 8  | 68 | Asymptomatic                     | SR                            |                                                                         |                                                   |
|               | I.1         | M | p.(Gln247*) +/-        | 60s     | Normal                     | 11 | 68 | Asymptomatic                     | SR                            |                                                                         |                                                   |
|               | I.2         | F | p.(Gln247*) +/-        | 50s     | Normal                     | 11 | 65 | Asymptomatic                     | SR                            |                                                                         |                                                   |
| <b>H2523</b>  | <b>II.2</b> | M | p.(Lys146Thrfs*24) +/+ | 40s/70s | End-stage HCM              | 16 | 43 | Heart Failure (NYHA III)         | AF                            | TIA                                                                     | MYBPC3 p.(Tyr213*) +/-                            |
|               | III.1       | F | p.(Lys146Thrfs*24) +/- | 40s     | Normal                     | 10 | 70 | Asymptomatic                     | SR                            |                                                                         | MYBPC3 p.(Tyr213*) -/-                            |
|               | III.2       | F | p.(Lys146Thrfs*24) +/- | 30s     | Normal                     | 8  | 70 | Asymptomatic                     | SR                            |                                                                         | MYBPC3 p.(Tyr213*) -/-                            |
|               | III.3       | F | p.(Lys146Thrfs*24) +/- | 30s     | Normal                     | 8  | 65 | Asymptomatic                     | SR                            |                                                                         | MYBPC3 p.(Tyr213*) -/-                            |
| <b>H6897</b>  | <b>II.3</b> | M | p.(Gln247*) +/+        | 10s/30s | HCM                        | 19 | 65 | Syncope                          | SR                            |                                                                         | KCNE1 p.(Arg36His) +/-<br>TCAP p.(Cys38Phe) +/-   |
|               | I.1         | M | Obligate carrier       | 50s     | Hypertensive heart disease | 13 | 60 | Asymptomatic                     | SR                            |                                                                         |                                                   |
| <b>H6438</b>  | <b>II.5</b> | F | p.(Cys23Tyr) +/+       | 60s/70s | End-stage HCM              | 12 | 43 | Heart Failure (NYHA II)          | SR. LVHC<br>Holter: AF bursts |                                                                         |                                                   |
|               | III.1       | F | p.(Cys23Tyr) +/-       | 50s     | Normal                     | 8  | 60 | Asymptomatic                     | SR                            |                                                                         |                                                   |

|               |       |   |                                              |         |                               |    |    |                                            |                          |     |                        |
|---------------|-------|---|----------------------------------------------|---------|-------------------------------|----|----|--------------------------------------------|--------------------------|-----|------------------------|
|               | III.3 | M | p.(Cys23Tyr) +/-                             | 40s     | Normal                        | 10 | 69 | Asymptomatic                               | SR                       |     |                        |
| <b>H997</b>   | II.2  | F | p.(Gln247*) +/-<br>p.(Lys146Thrfs*24)<br>-/+ | 10s/30s | HCM                           | 24 | 74 | Asthenia                                   | SR, LVHC                 |     | DTNA p.(Val174Ile) +/- |
|               | I.1   | M | p.(Gln247*) -/-<br>p.(Lys146Thrfs*24)<br>-/+ | 60s     | Normal                        | 12 | 65 | Asymptomatic                               | SR                       |     |                        |
|               | I.2   | F | p.(Gln247*) +/-<br>p.(Lys146Thrfs*24)<br>-/- | 50s     | Normal                        | 11 | 62 | Asymptomatic                               | SR                       |     |                        |
|               | II.3  | F | p.(Gln247*) +/-<br>p.(Lys146Thrfs*24)<br>-/- | 30s     | Normal                        | 9  | 60 | Asymptomatic                               | SR                       |     |                        |
| <b>H3112</b>  | II.7  | M | p.(Cys75Tyr) +/-<br>p.(Gln247*) -/+          | 30s/30s | HCM                           | 23 | 76 | Asymptomatic                               | SR, LVHC                 |     |                        |
|               | II.5  | M | p.(Cys75Tyr) +/-<br>p.(Gln247*) -/+          | 30s     | HCM                           | 18 | 71 | Asymptomatic                               | SR, LVHC                 |     |                        |
|               | II.2  | M | ?                                            | 40s     | Normal                        | 11 | 68 | Asymptomatic                               | SR                       |     |                        |
|               | II.3  | M | ?                                            | 40s     | Normal                        | 11 | 69 | Asymptomatic                               | SR                       |     |                        |
|               | II.4  | M | p.(Gln247*) -/+                              | 30s     | Normal                        | 9  | 61 | Asymptomatic                               | SR                       |     |                        |
|               | II.8  | F | Non-carrier                                  | 20s     | Normal                        | 9  | 65 | Asymptomatic                               | SR                       |     |                        |
|               | I.2   | F | p.(Cys75Tyr) +/-                             | 60s     | Hypertensive<br>heart disease | 13 | 63 | Asymptomatic                               | SR                       |     |                        |
| <b>H77085</b> | II.5  | M | p.(Ser161Cysfs*8)<br>+/+                     | 30s/50s | HCM                           | 17 | 59 | Angina + Heart<br>Failure (NYHA<br>II)     | SR, LVHC<br>Holter: NSVT |     |                        |
|               | III.2 | M | ?                                            | 60s     | Normal                        | 12 | 67 | Asymptomatic                               | SR                       |     |                        |
| <b>H8565</b>  | II.1  | M | p.(Cys145Tyr) +/+                            | 50s/50s | RCM                           | 12 | 55 | Palpitations<br>Heart Failure<br>(NYHA II) | SR, LVHC                 |     | DSC2 p.(Val129Ile) +/- |
|               | II.2  | F | p.(Cys145Tyr) +/-                            | 50s     | Normal                        | 6  | 67 | Asymptomatic                               | SR                       |     |                        |
|               | II.3  | F | p.(Cys145Tyr) +/-                            | 50s     | Normal                        | 7  | 72 | Asymptomatic                               | SR                       |     |                        |
|               | II.4  | M | p.(Cys145Tyr) +/-                            | 40s     | Normal                        | 11 | 72 | Asymptomatic                               | SR                       |     |                        |
| <b>FT3104</b> | II.2  | M | p.(Gln247*) +/+                              | 20s/40s | HCM                           | 21 | 34 | Heart Failure<br>(NYHA II)                 | SR, LVHC<br>Holter: NSTV | TIA |                        |

|               |             |   |                                      |         |              |    |    |                                               |          |                                |                                                |
|---------------|-------------|---|--------------------------------------|---------|--------------|----|----|-----------------------------------------------|----------|--------------------------------|------------------------------------------------|
|               | II:1        | M | p.(Gln247*) +/-                      | 40s     | Normal       | 11 | 66 | Asymptomatic                                  | SR       |                                |                                                |
|               | I:1         | M | p.(Gln247*) +/-                      | 60s     | Normal       | 12 | 64 | Asymptomatic                                  | SR       |                                |                                                |
|               | I:2         | F | p.(Gln247*) +/-                      | 60s     | Normal       | 10 | 61 | Asymptomatic                                  | SR       |                                |                                                |
| <b>H83562</b> | <b>II:2</b> | F | p.(Cys75Tyr) +/-<br>p.(Leu37Val) -/+ | 40s/50s | HCM          | 17 | 60 | Angina (CCS II)<br>Heart Failure<br>(NYHA II) | SR, LVHC |                                |                                                |
|               | III:1       | M | p.(Cys75Tyr) +/-                     | 20s     | Normal       | 11 | 56 | Asymptomatic                                  | SR       |                                |                                                |
| <b>H5850</b>  | <b>II:2</b> | M | p.(Cys75Tyr) +/+                     | 30s/60s | HCM          | 21 | 62 | Heart Failure<br>(NYHA II)                    | Paced    | Inappropriate ICD<br>discharge | TCAP p.(Ala118Val) +/-                         |
|               | III:2       | M | ?                                    | 40s     | Normal       | 11 | 60 | Asymptomatic                                  | SR       |                                |                                                |
|               | III:3       | F | ?                                    | 40s     | Normal       | 10 | 64 | Asymptomatic                                  | SR       |                                |                                                |
|               | III:4       | F | ?                                    | 30s     | Normal       | 10 | 59 | Asymptomatic                                  | SR       |                                |                                                |
|               | II:1        | F | ?                                    | 80s     | Normal       | 12 | 60 | Asymptomatic                                  | SR       |                                |                                                |
| <b>H4094</b>  | <b>II:7</b> | M | p.(Ser161Cysfs*8)<br>+/+             | 20s/30s | HCM<br>(ASH) | 29 | 48 | Heart Failure<br>(NYHA II)                    | Paced    | Inappropriate ICD<br>discharge | TTN p.(Tyr10050Cys) +/-<br>TPM1 c.375-3C>T +/- |
|               | II:3        | F | Non-carrier                          | 50s     | Normal       | 9  | 60 | Asymptomatic                                  | SR       |                                |                                                |
|               | II:4        | F | p.(Ser161Cysfs*8)<br>+/-             | 40s     | Normal       | 11 | 60 | Asymptomatic                                  | SR       |                                |                                                |
|               | II:5        | M | Non-carrier                          | 40s     | Normal       | 10 | 68 | Asymptomatic                                  | SR       |                                |                                                |
|               | II:6        | M | Non-carrier                          | 40s     | Normal       | 10 | 65 | Asymptomatic                                  | SR       |                                |                                                |
| <b>H12238</b> | <b>II:1</b> | M | p.(Gln247*) +/+                      | 40s     | HCM          | 28 | 60 | Asymptomatic                                  | SR       |                                |                                                |

**Note:** Subjects in bold correspond to index cases.

ATWI = anterior T-wave inversion; FU = follow-up; f = females; m = males; ? = unknown genotype; HCM = hypertrophic cardiomyopathy; RCM = restrictive cardiomyopathy; SR = sinus rhythm; LVHC = left ventricular hypertrophy criteria; RBBB = right bundle branch block; CVE = cerebrovascular event; TIA = transient ischemic attack; ICD = implantable cardioverter-defibrillator; PVC = premature ventricular contractions; +/- = heterozygous; +/+ = homozygous

**Supplementary Table 4:** Likelihood of the odds (LOD) score reflecting linkage between *TRIM63* mutations and HCM in individual families.

| Family ID | TRIM63 Variant(s)             | Family members | Genotyped | Homozygous/<br>comp. heterozygous | LOD score |
|-----------|-------------------------------|----------------|-----------|-----------------------------------|-----------|
| H8758     | p.Leu319Pro                   | 27             | 14        | 2                                 | 0.99      |
| H12238    | p.Gln247*                     | 7              | 0         | 1                                 | 0.00      |
| H2768     | p.Gln247*                     | 5              | 2         | 2                                 | 0.73      |
| H83562    | p.Cys75Tyr<br>p.Leu37Val      | 7              | 1         | 1                                 | 0.00      |
| H4094     | p.Ser161Cysfs*8               | 14             | 5         | 1                                 | 0.50      |
| H5850     | p.Cys75Tyr                    | 10             | 1         | 1                                 | 0.00      |
| FT3104    | p.Gln247*                     | 7              | 4         | 1                                 | 0.12      |
| H8565     | p.Cys145Tyr                   | 6              | 4         | 1                                 | 0.37      |
| H77085    | p.Ser161Cysfs*8               | 15             | 1         | 1                                 | 0.00      |
| H3112     | p.Cys75Tyr<br>p.Gln247*       | 17             | 5         | 2                                 | 0.55      |
| H997      | p.Gln247*<br>p.Lys146Thrfs*24 | 6              | 4         | 1                                 | 0.12      |

|                         |                               |    |   |   |             |
|-------------------------|-------------------------------|----|---|---|-------------|
| H3438                   | p.Cys23Tyr                    | 13 | 3 | 1 | 0.01        |
| H6897                   | p.Gln247*                     | 8  | 1 | 1 | 0.00        |
| H2523                   | p.Lys146Thrfs*24<br>p.Tyr213* | 10 | 4 | 1 | 0.01        |
| H5180                   | p.Cys23Tyr                    | 20 | 4 | 1 | 0.12        |
| H8343                   | p.Cys23Tyr                    | 12 | 6 | 2 | 0.73        |
| <b>TOTAL LODs SCORE</b> |                               |    |   |   | <b>4.25</b> |

LOD score: Logarithms of the odds score calculated for a disease penetrance of 95% (recessive).

**Supplementary Table 5.** Detailed clinical characteristics of homozygous/compound heterozygous individuals

| Family | Subject | Gender | TRIM63 variant | Decade at diagnosis/<br>last follow up | Diagnosis               | Reason for diagnosis | NYHA functional class | LVEDD (mm) | LVMW T (mm) | LA (mm) | EF (%) | ECG/<br>Holter              | CK level | ICD or PM | Events | Others                    |
|--------|---------|--------|----------------|----------------------------------------|-------------------------|----------------------|-----------------------|------------|-------------|---------|--------|-----------------------------|----------|-----------|--------|---------------------------|
| H8343  | II.2    | F      | p.(Cys23Tyr)   | 20s/40s                                | HCM (ASH)               | Abnormal ECG         | I                     | 47         | 20          | 40      | 68     | SR,<br>LVHC.<br>NSVT        | 90       |           | CVE    | Pending ICD implantation. |
|        | II.4    | M      | p.(Cys23Tyr)   | 20s/40s                                | HCM (ASH)               | Family screening     | I                     | 40         | 28          | 43      | 70     | SR,<br>LVHC.<br>NSVT        |          | ICD       |        |                           |
| H8758  | II.11   | M      | p.(Leu319Pro)  | 20s/40s                                | HCM (ASH)               | Abnormal ECG         | I                     | 52         | 22          |         | 70     | SR.<br>LVHC.<br>NSVT        | 83       |           | TIA    |                           |
|        | II.6    | F      | p.(Leu319Pro)  | 40s                                    | Possibly affected (HCM) | Family screening     | I                     | 44         | 9           |         | 68     | SR, LVHC<br>AnteriorT<br>WI |          |           |        |                           |
| H5180  | II.2    | F      | p.(Cys23Tyr)   | 50s/70s                                | HCM (ASH)               | Dyspnea              | II                    | 51         | 20          | 43      | 65     | SR.<br>AsVp                 |          | PM        |        | Symptomatic second-degree |



| Family | Subject | Gender | TRIM63 variant     | Decade at diagnosis/<br>last follow up | Diagnosis                  | Reason for diagnosis | NYHA functional class | LVEDD (mm) | LVMW T (mm) | LA (mm) | EF (%) | ECG/<br>Holter                    | CK level | ICD or PM | Events        | Others                                                   |
|--------|---------|--------|--------------------|----------------------------------------|----------------------------|----------------------|-----------------------|------------|-------------|---------|--------|-----------------------------------|----------|-----------|---------------|----------------------------------------------------------|
|        |         |        |                    |                                        |                            |                      |                       |            |             |         |        |                                   |          |           |               | AV block.                                                |
| H10022 | II.2    | M      | p.(Gln247*)        | 20s/30s                                | HCM (concentric)           | Palpitations         | I                     | 50         | 16          | 37      | 56     | SR,<br>LVHC.<br>Isolated<br>VPCs. | 490      |           |               | Normal neurological examination.<br>Normal MRI of limbs. |
|        | II.1    | M      | p.(Gln247*)        | 30s                                    | Possibly affected (HCM)    | Family screening     | I                     | 48         | 12          | 35      | 64     | SR,<br>LVHC.<br>Lateral<br>TWI    | 400      |           |               |                                                          |
| H2523  | II.2    | M      | p.(Lys146Thrfs*24) | 40s/70s                                | End-stage HCM (concentric) | Dyspnea              | III                   | 60         | 16          | 51      | 33     | AF<br>Vp                          |          | CRT-D     | TIA at age 65 | AF with uncontrollable ventricular response.<br>AV node  |

| Family | Subject | Gender | TRIM63 variant                      | Decade at diagnosis/<br>last follow up | Diagnosis        | Reason for diagnosis | NYHA functional class | LVEDD (mm) | LVMW T (mm) | LA (mm) | EF (%) | ECG/<br>Holter            | CK level | ICD or PM | Events | Others                                                         |
|--------|---------|--------|-------------------------------------|----------------------------------------|------------------|----------------------|-----------------------|------------|-------------|---------|--------|---------------------------|----------|-----------|--------|----------------------------------------------------------------|
|        |         |        |                                     |                                        |                  |                      |                       |            |             |         |        |                           |          |           |        | ablation.<br>Carrier or the <i>MYBPC3</i> p.(Tyr213*) variant. |
| H6897  | II.3    | M      | p.(Gln247*)                         | 10s/30s                                | HCM (concentric) | Syncope              | I                     | 47         | 20          | 49      | 65     | SR,<br>LVHC,<br>NSVT      | 205      | ICD       |        | Normal CT of limbs. Normal muscle biopsy.                      |
| H6438  | II.5    | F      | p.(Cys23Tyr)                        | 60s/70s                                | End-stage HCM    | Dyspnea              | II                    | 57         | 12          |         | 43     | SR,<br>LVHC,<br>AF bursts |          |           |        | LVMWT 17 mm at first evaluation.                               |
| H997   | II.2    | F      | p.(Gln247*) +<br>p.(Lys146Thrfs*24) | 10s/30s                                | HCM (ASH)        | Asthenia             | I                     | 43         | 24          | 40      | 74     | SR,<br>LVHC.              | 229      |           |        |                                                                |

| Family | Subject | Gender | TRIM63 variant             | Decade at diagnosis/last follow up | Diagnosis        | Reason for diagnosis | NYHA functional class | LVEDD (mm) | LVMW T (mm) | LA (mm) | EF (%) | ECG/Holter     | CK level | ICD or PM | Events        | Others                                                   |
|--------|---------|--------|----------------------------|------------------------------------|------------------|----------------------|-----------------------|------------|-------------|---------|--------|----------------|----------|-----------|---------------|----------------------------------------------------------|
| H3112  | II.7    | M      | p.(Cys75Tyr) + p.(Gln247*) | 30s/30s                            | HCM (concentric) | Abnormal ECG         | I                     | 54         | 23          | 49      | 76     | SR, LVHC.      | 70       |           |               |                                                          |
|        | II.5    | M      | p.(Cys75Tyr) + p.(Gln247*) | 30s                                | HCM (concentric) | Family Screening     | I                     | 42         | 18          | 37      | 71     | SR, LVHC.      |          |           |               |                                                          |
| H77085 | II.5    | M      | p.(Ser161Cysfs*8)          | 30s/50s                            | End-stage HCM    | Angina               | II                    | 35         | 17          | 46      | 59     | SR, LVHC. NSVT | 100      | ICD       |               | LVMWT 33 mm at first evaluation.                         |
| H8565  | II:1    | M      | p.(Cys145Tyr)              | 50s/50s                            | RCM              | Palpitations         | II                    | 52         | 12          | 55      | 55     | SR, LVHC. NSVT |          |           |               | Elevated filling pressures. PH.                          |
| FT3104 | II.2    | M      | p.(Gln247*)                | 20s/40s                            | End-stage HCM    | Syncope              | II                    | 61         | 21          | 43      | 34     | SR, LVHC. NSVT | 220      | ICD       | TIA at age 40 | Apical aneurysm. Normal CT of limbs. Normal neurological |

| Family | Subject | Gender | TRIM63 variant                 | Decade at diagnosis/<br>last follow up | Diagnosis        | Reason for diagnosis | NYHA functional class | LVEDD (mm) | LVMW T (mm) | LA (mm) | EF (%) | ECG/<br>Holter       | CK level | ICD or PM | Events                      | Others                                       |
|--------|---------|--------|--------------------------------|----------------------------------------|------------------|----------------------|-----------------------|------------|-------------|---------|--------|----------------------|----------|-----------|-----------------------------|----------------------------------------------|
|        |         |        |                                |                                        |                  |                      |                       |            |             |         |        |                      |          |           |                             | examination.                                 |
| H83562 | II.2    | F      | p.(Cys75Tyr) +<br>p.(Leu37Val) | 40s/50s                                | HCM<br>(ASH)     | Angina               | II                    | 47         | 17          | 37      | 60     | SR,<br>LVHC.         |          |           |                             |                                              |
| H5850  | II.2    | M      | p.(Cys75Tyr)                   | 30s/60s                                | HCM<br>(ASH)     | Palpitations         | II                    | 60         | 21          | 43      | 62     | AF,<br>NSVT,<br>SVT  |          | ICD       | Inappropriate ICD discharge | ICD for secondary prevention (sustained VT). |
| H4094  | II.7    | M      | p.(Ser161Cysfs*8)              | 20s/30s                                | End-stage<br>HCM | Abnormal<br>ECG      | II                    | 59         | 29          | 51      | 48     | SR,<br>LVHC.<br>NSVT | 638      | ICD       | Inappropriate ICD discharge |                                              |
| H12238 | II:1    | M      | p.(Gln247*)                    | 40s                                    | HCM              | Abnormal<br>ECG      | I                     | 43         | 28          | 37      | 60     | SR                   | 203      |           |                             | Normal neurological examination.             |

AF = atrial fibrillation; CT = computed tomography; CVE = cerebrovascular event; HCM = hypertrophic cardiomyopathy; ICD = implantable cardioverter-defibrillator; LVHC = left ventricular hypertrophy criteria; PH = pulmonary hypertension; RBBB = right bundle branch block; RCM = restrictive cardiomyopathy; SR = sinus rhythm; TIA = transient ischemic attack; TWI = T-wave inversion; VT = ventricular tachycardia

Supplementary Figure 1: Pedigrees of the evaluated families

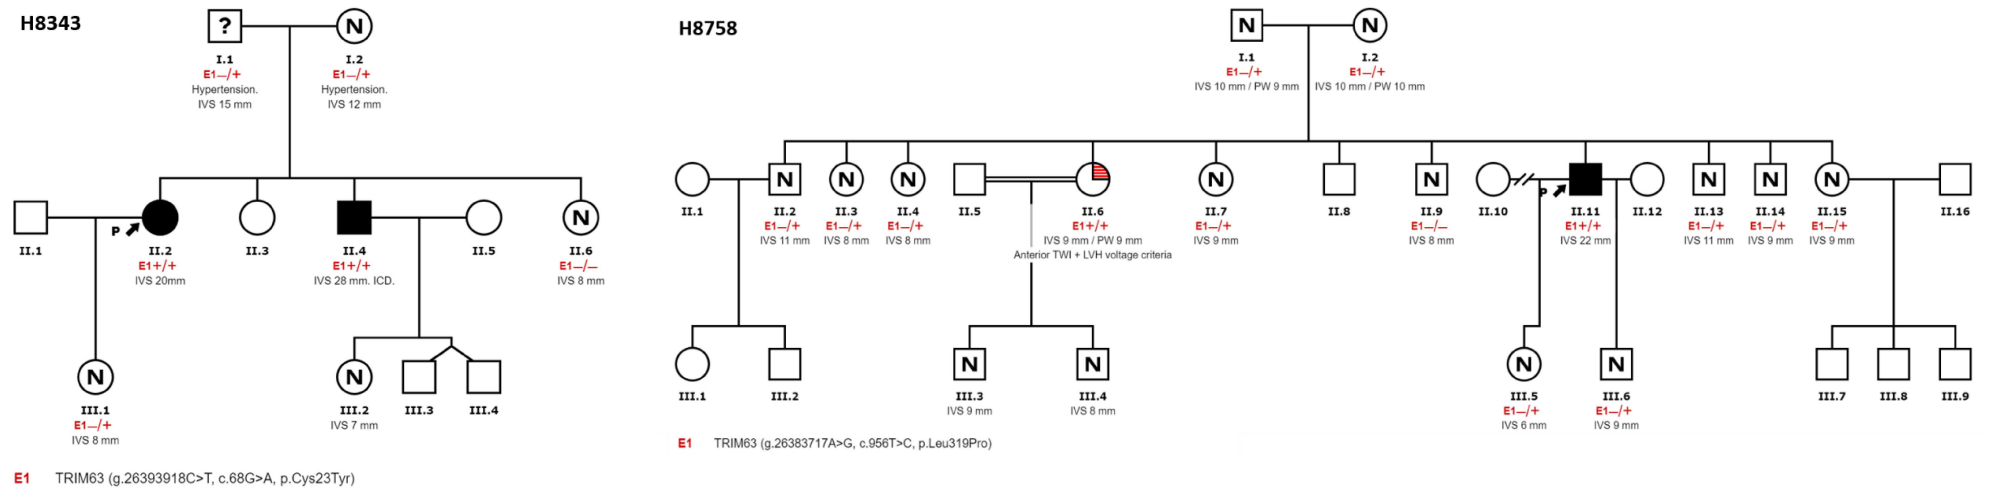

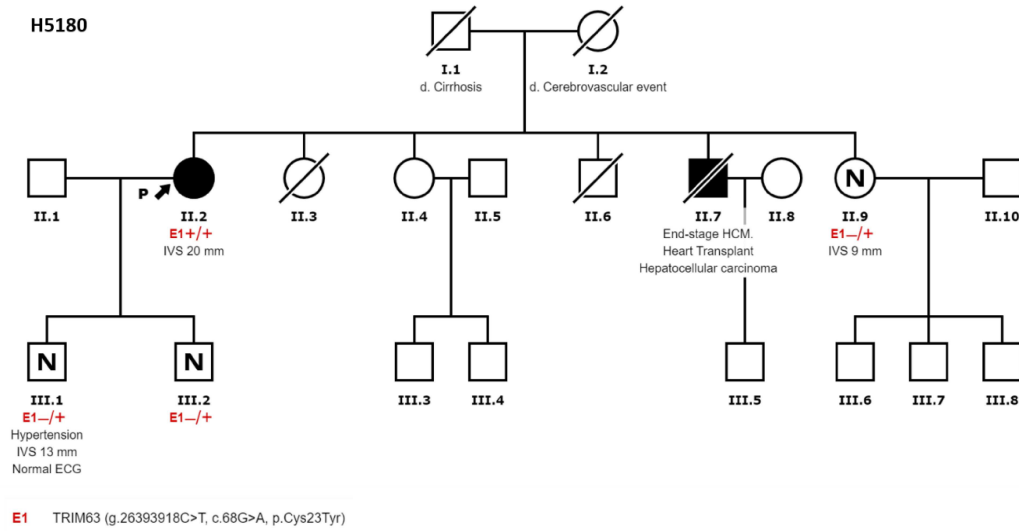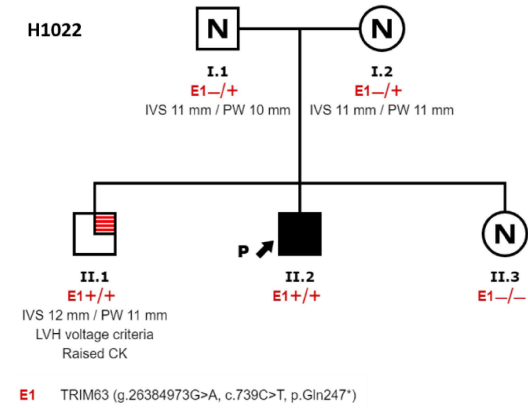

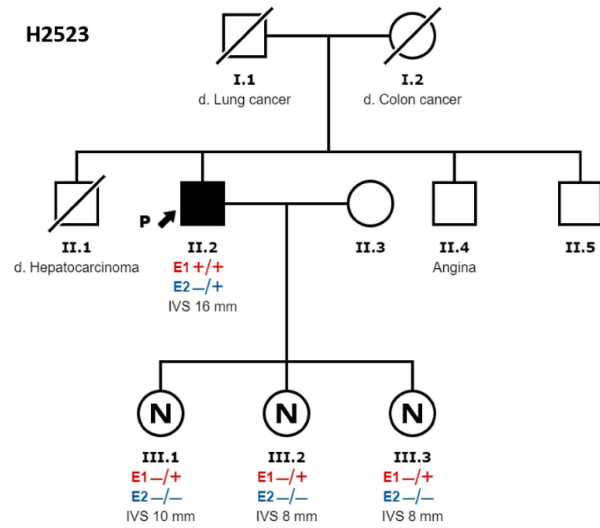

**E1** TRIM63 (g.26387716\_26387721delACACCTinsGG, c.437\_442delAGGTGinsCC, p.Lys146Thrfs\*24)

**E2** MYBPC3 (g.47371340G>C, c.639C>G, p.Tyr213\*)

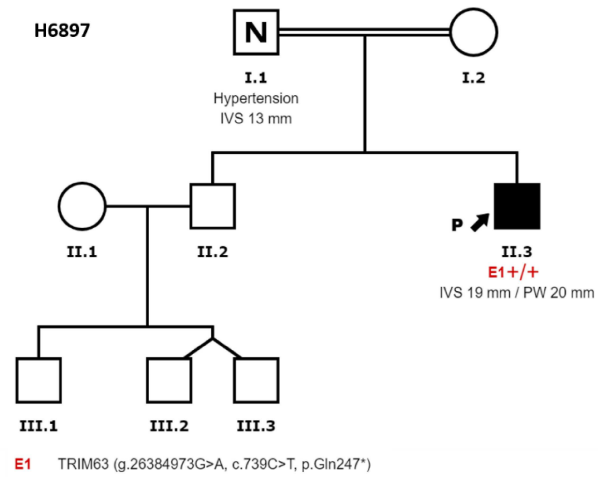



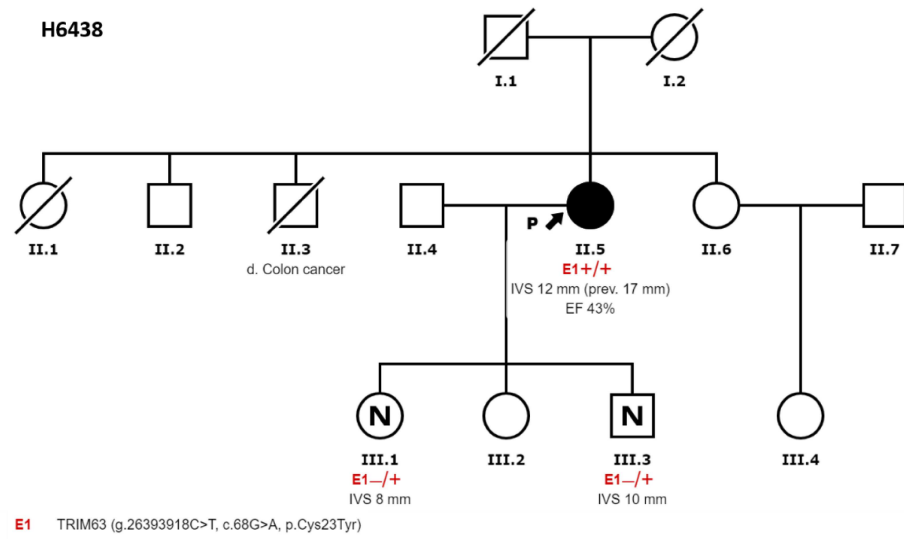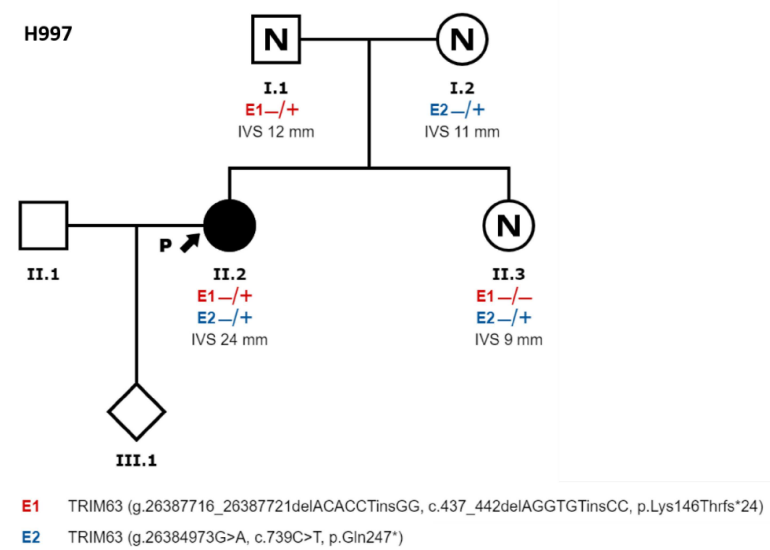

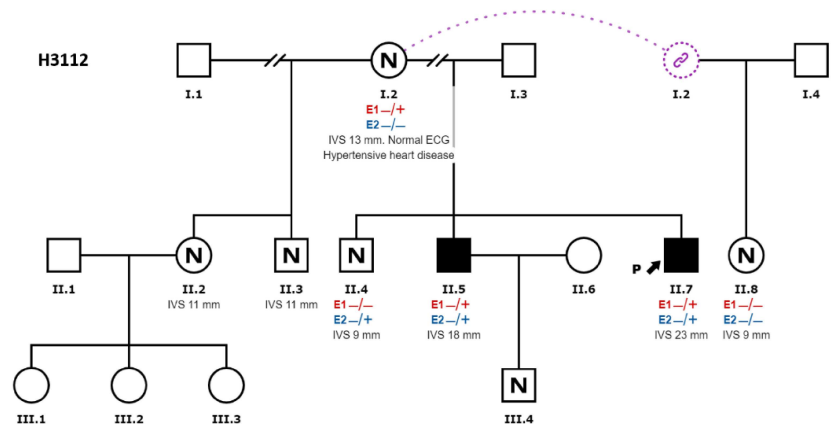

E1 TRIM63 (g.26392867C>T, c.224G>A, p.Cys75Tyr)  
 E2 TRIM63 (g.26384973G>A, c.739C>T, p.Gln247\*)

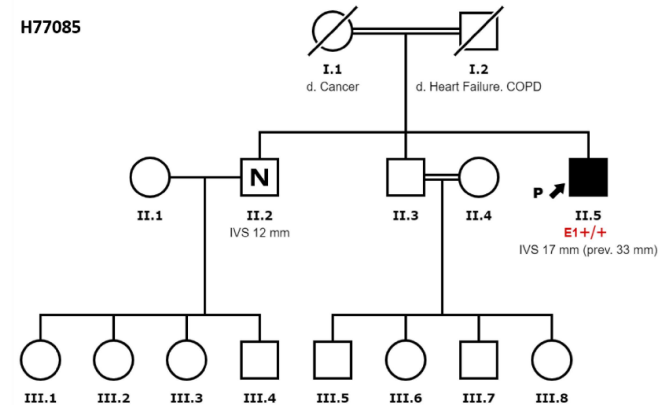

E1 TRIM63 (g.26387678\_26387679delCT, c.481\_482delAG, p.Ser161Cysfs\*8)

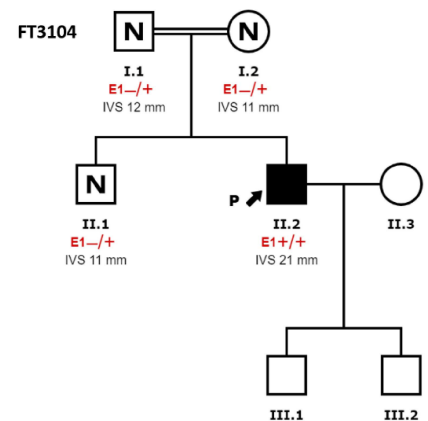

E1 TRIM63 (g.26384973G>A, c.739C>T, p.Gln247\*)

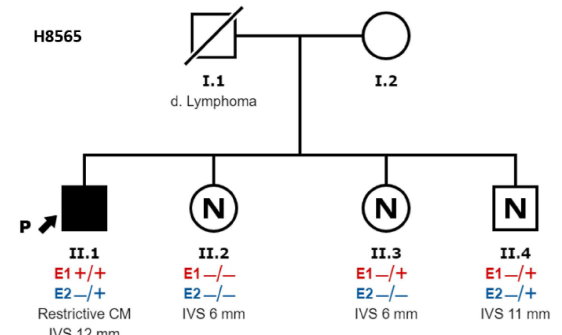

E1 TRIM63 (g.26387724C>T, c.434G>A, p.Cys145Tyr)  
 E2 MYBPC3 (g.47360203G>A, c.2176C>T, p.Arg726Cys)

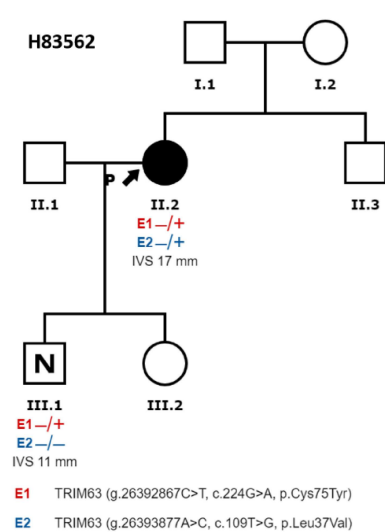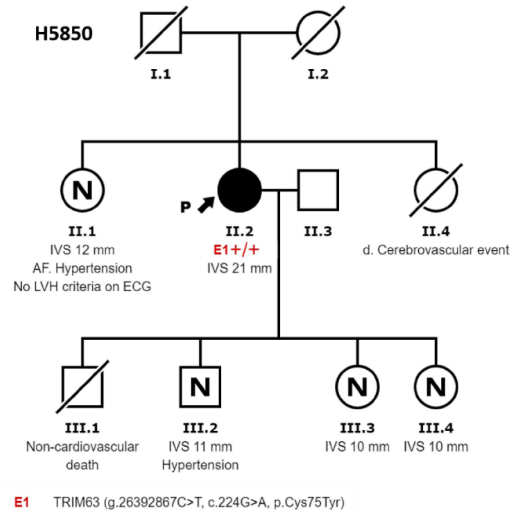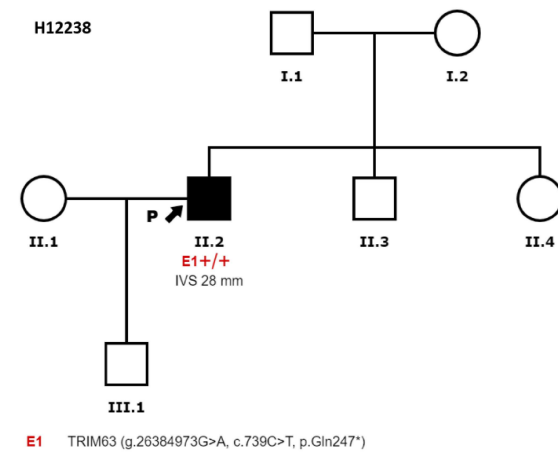

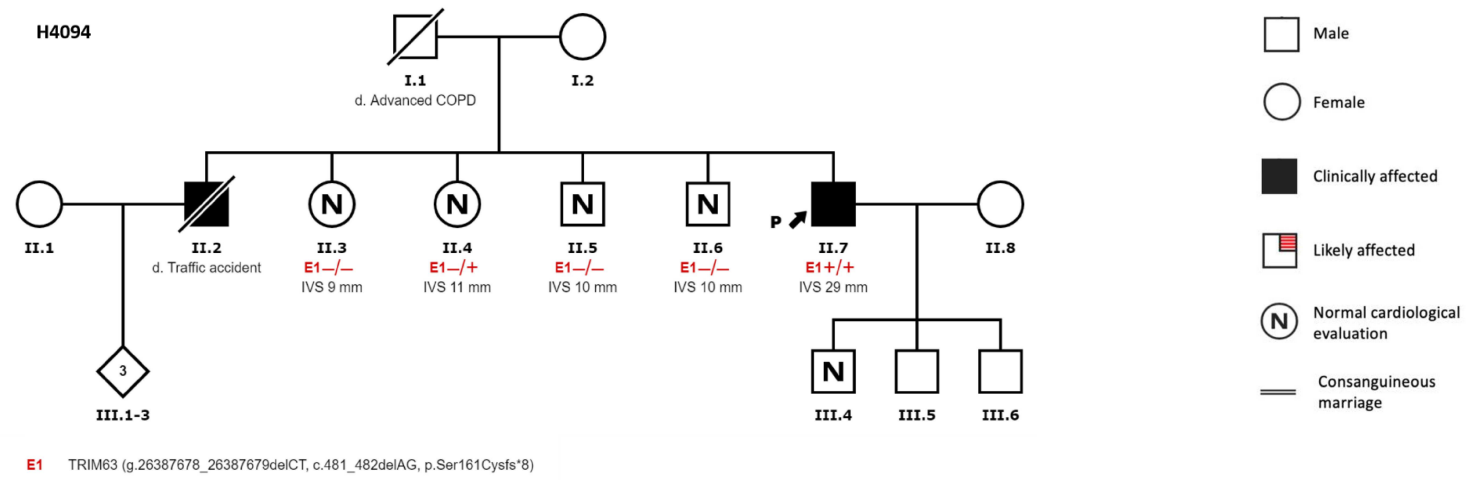

**Supplementary Figure 2.** ECG of patients II.6 (family H8758) and II.1 (family H10022) showing LV hypertrophy criteria and repolarization abnormalities.

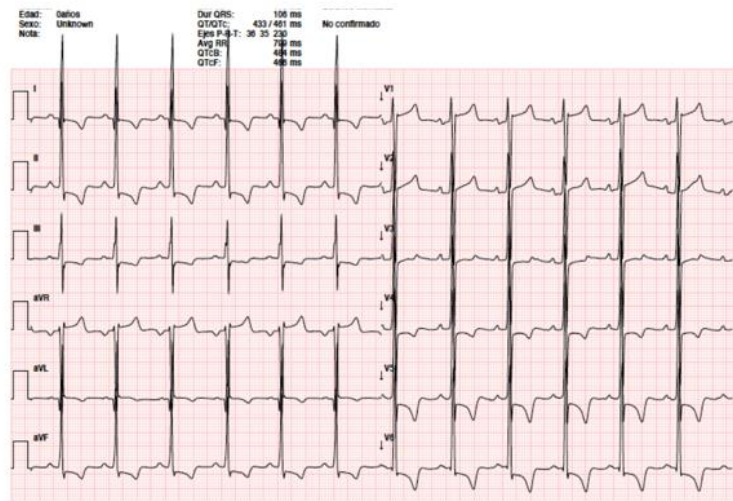

H8758. II.6

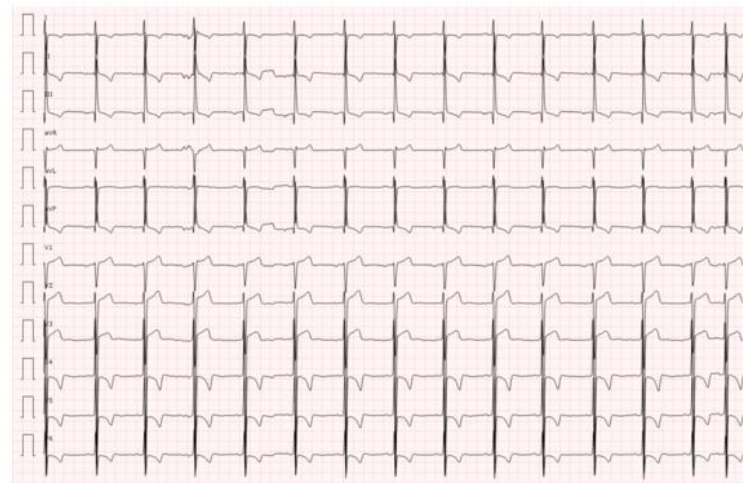

H10022 II.1

**Supplementary Figure 3.** Schematic representation of the ubiquitin proteasome system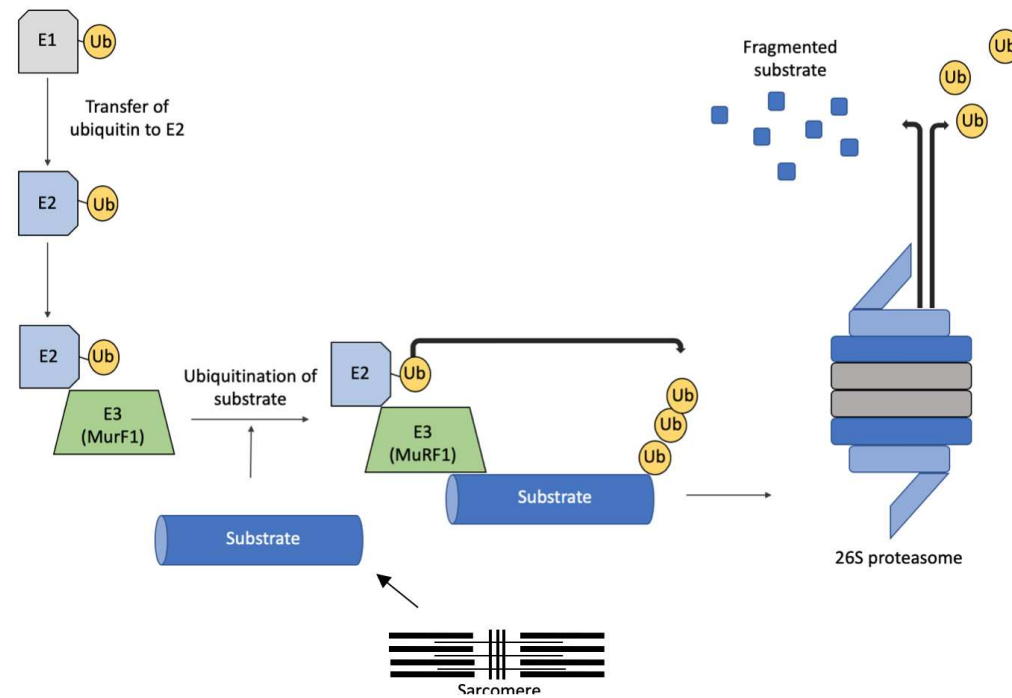

Ubiquitin is activated by the E1 enzyme and is transferred to E2. Afterwards, E2 transfers the activated ubiquitin to a substrate that is bound to an E3 ubiquitin ligase (encoded by *TRIM63*). Ubiquitins serve as a signal for protein degradation by the 26S proteasome.

#### Supplementary Figure 4. Conservation of the RING domain of TRIM63

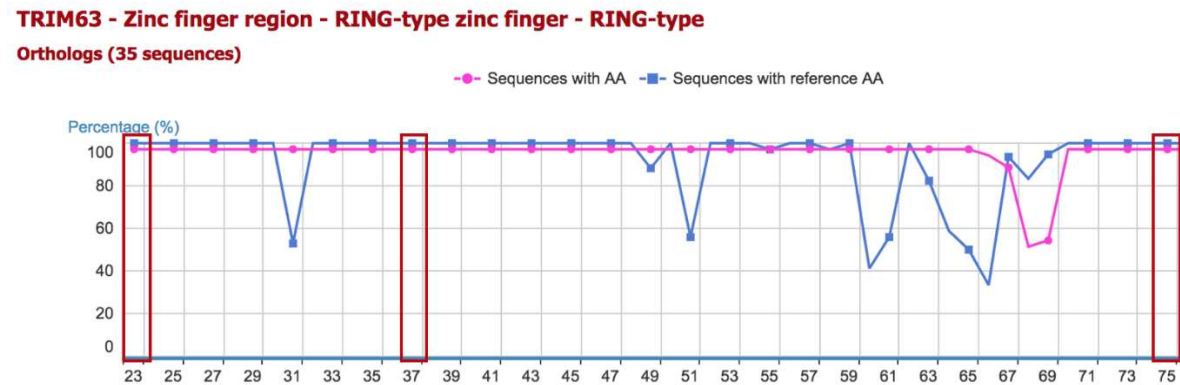

Analysis of conservation of the RING domain of TRIM63 in 35 orthologous sequences. The pink line shows the percentage of sequences with amino acids suitable for analysis, whereas the blue line shows the percentage of sequences that contain the reference amino acid (the most-conserved residues are present in 100% of sequences). The red boxes show the amino acids where mutations in the RING domain were found. It can be seen that these mutations are located in extremely conserved regions.
